# Supplementary material for: Muscle strength, not muscle mass, determines the health-related quality of life in Indonesian women with systemic lupus erythematosus
Source: HighWire-hosted journal article supplement (doi:10.1136/lupus-2023-001025), 2023-11-01
Supplement: lupus-2023-001025supp001_data_supplement.pdf [file lupus-2023-001025supp001_data_supplement.pdf]

**Supp. Table 1. Age-adjusted analysis of relevant factors associated with the SarQoL total score**

| Variables                                           | Grouping (n)         | SarQoL total score*† |                           |                      |
|-----------------------------------------------------|----------------------|----------------------|---------------------------|----------------------|
|                                                     |                      | Mean (SD)            | Mean difference (95% CI)  | Age-adjusted p-value |
| Body Mass Index (kg/m <sup>2</sup> )**              | Normal (68)          | 71.48 (13.55)        | .867 (-3.39-5.12)         | .606                 |
|                                                     | Abnormal (77)        | 70.61 (12.39)        |                           |                      |
| <b>Muscle strength (kg)</b>                         | <b>Good (94)</b>     | <b>74.36 (10.57)</b> | <b>9.50 (5.33-13.66)</b>  | <b>&lt;0.001</b>     |
|                                                     | <b>Low (51)</b>      | <b>64.85 (14.56)</b> |                           |                      |
| Walking speed (m/s)                                 | Normal (17)          | 75.39 (10.02)        | 4.95 (-1.6-11.51)         | .264                 |
|                                                     | Low (128)            | 70.43 (13.17)        |                           |                      |
| Appendicular Muscle Mass Index                      | Good (118)           | 71.07 (12.86)        | .28 (-5.18-5.74)          | .565                 |
|                                                     | Low (27)             | 70.79 (13.34)        |                           |                      |
| Sarcopenia status                                   | Non-Sarcopenic (119) | 70.97 (12.85)        | -0.23 (-5.77-5.30)        | .734                 |
|                                                     | Sarcopenic (26)      | 71.21 (13.42)        |                           |                      |
| Vitamin D25OH level (ng/mL)                         | Normal (44)          | 71.03 (11.85)        | 0.01 (-4.60-4.64)         | .757                 |
|                                                     | Deficiency (101)     | 71.01 (13.40)        |                           |                      |
| Daily protein intake (g/kg BW)                      | Sufficient (92)      | 72.38 (12.30)        | 3.74 (-0.63-8.11)         | .119                 |
|                                                     | Insufficient (53)    | 68.64 (13.69)        |                           |                      |
| Daily PUFA intake (mg)                              | Sufficient (79)      | 71.56 (12.70)        | 1.20 (-3.06-5.47)         | .694                 |
|                                                     | Insufficient (66)    | 70.36 (13.21)        |                           |                      |
| Weekly IPAQ score (minutes)                         | Moderate-High (95)   | 71.95 (12.62)        | 2.33 (-2.12-6.79)         | .229                 |
|                                                     | Low (49)             | 69.62 (13.21)        |                           |                      |
| Weekly moderate-heavy physical activity (minutes)   | Sufficient (46)      | 72.43 (10.94)        | 1.86 (-2.67-6.40)         | .270                 |
|                                                     | Insufficient (98)    | 70.56 (13.64)        |                           |                      |
| Barthel's Activity of Daily Living                  | Independent (69)     | 72.42 (11.34)        | 2.68 (-1.50-6.87)         | .166                 |
|                                                     | Dependent (76)       | 69.74 (14.14)        |                           |                      |
| Time diagnosed with lupus (years)                   | ≤ 5 years (74)       | 70.28 (12.62)        | -1.60 (-5.8-2.66)         | .219                 |
|                                                     | ≥ 5 years (70)       | 71.89 (13.31)        |                           |                      |
| 30 days MEX-SLEDAI score (points)                   | <2 (28)              | 74.74 (10.43)        | 4.62 (-0.71-9.95)         | .105                 |
|                                                     | ≥2 (117)             | 70.12 (13.31)        |                           |                      |
| <b>Lupus Arthritis</b>                              | <b>No (93)</b>       | <b>73.07 (11.97)</b> | <b>5.72 (1.39-10.05)</b>  | <b>&lt;0.001</b>     |
|                                                     | <b>Yes (52)</b>      | <b>67.34 (13.80)</b> |                           |                      |
| <b>Pain score (VAS)</b>                             | <b>≤ 4 (94)</b>      | <b>74.73 (10.65)</b> | <b>10.57 (6.11-15.03)</b> | <b>&lt;0.001</b>     |
|                                                     | <b>&gt; 4 (51)</b>   | <b>64.16 (13.96)</b> |                           |                      |
| Serum CRP level (mg/dL)                             | Normal (59)          | 73.66 (12.12)        | 7.14 (.47-13.81)          | .080                 |
|                                                     | Increased (17)       | 66.52 (12.30)        |                           |                      |
| Corticosteroid usage in the previous month          | No (22)              | 70.83 (13.63)        | -0.221 (-6.14-5.70)       | .479                 |
|                                                     | Yes (123)            | 71.05 (12.83)        |                           |                      |
| Corticosteroid mean dose (mg prednisone equivalent) | Low (107)            | 71.20 (12.72)        | .704 (-4.13-5.53)         | .793                 |
|                                                     | High (38)            | 70.49 (13.57)        |                           |                      |

**Supp. Table 2. Age and minutes physical activity-adjusted analysis of relevant factors associated with the SarQoL total score**

| Variables                                           | Grouping (n)         | SarQoL total score*† |                           |                                                    |
|-----------------------------------------------------|----------------------|----------------------|---------------------------|----------------------------------------------------|
|                                                     |                      | Mean (SD)            | Mean difference (95% CI)  | Age and minutes physical activity-adjusted p-value |
| Body Mass Index (kg/m <sup>2</sup> )**              | Normal (68)          | 71.48 (13.55)        | .867 (-3.39-5.12)         | .591                                               |
|                                                     | Abnormal (77)        | 70.61 (12.39)        |                           |                                                    |
| <b>Muscle strength (kg)</b>                         | <b>Good (94)</b>     | <b>74.36 (10.57)</b> | <b>9.50 (5.33-13.66)</b>  | <b>&lt;0.001</b>                                   |
|                                                     | <b>Low (51)</b>      | <b>64.85 (14.56)</b> |                           |                                                    |
| Walking speed (m/s)                                 | Normal (17)          | 75.39 (10.02)        | 4.95 (-1.6-11.51)         | .286                                               |
|                                                     | Low (128)            | 70.43 (13.17)        |                           |                                                    |
| Appendicular Muscle Mass Index                      | Good (118)           | 71.07 (12.86)        | .28 (-5.18-5.74)          | .612                                               |
|                                                     | Low (27)             | 70.79 (13.34)        |                           |                                                    |
| Sarcopenia status                                   | Non-Sarcopenic (119) | 70.97 (12.85)        | -0.23 (-5.77-5.30)        | .783                                               |
|                                                     | Sarcopenic (26)      | 71.21 (13.42)        |                           |                                                    |
|                                                     | Sarcopenic (26)      | 71.21 (13.42)        |                           |                                                    |
| Vitamin D25OH level (ng/mL)                         | Normal (44)          | 71.03 (11.85)        | 0.01 (-4.60-4.64)         | .780                                               |
|                                                     | Deficiency (101)     | 71.01 (13.40)        |                           |                                                    |
| Daily protein intake (g/kg BW)                      | Sufficient (92)      | 72.38 (12.30)        | 3.74 (-0.63-8.11)         | .127                                               |
|                                                     | Insufficient (53)    | 68.64 (13.69)        |                           |                                                    |
| Daily PUFA intake (mg)                              | Sufficient (79)      | 71.56 (12.70)        | 1.20 (-3.06-5.47)         | .692                                               |
|                                                     | Insufficient (66)    | 70.36 (13.21)        |                           |                                                    |
| Weekly moderate-heavy physical activity (minutes)   | Sufficient (46)      | 72.43 (10.94)        | 1.86 (-2.67-6.40)         | .350                                               |
|                                                     | Insufficient (98)    | 70.56 (13.64)        |                           |                                                    |
| Barthel's Activity of Daily Living                  | Independent (69)     | 72.42 (11.34)        | 2.68 (-1.50-6.87)         | .170                                               |
|                                                     | Dependent (76)       | 69.74 (14.14)        |                           |                                                    |
| Time diagnosed with lupus (years)                   | ≤ 5 years (74)       | 70.28 (12.62)        | -1.60 (-5.8-2.66)         | .203                                               |
|                                                     | ≥ 5 years (70)       | 71.89 (13.31)        |                           |                                                    |
| 30 days MEX-SLEDAI score (points)                   | <2 (28)              | 74.74 (10.43)        | 4.62 (-0.71-9.95)         | .113                                               |
|                                                     | ≥2 (117)             | 70.12 (13.31)        |                           |                                                    |
| <b>Lupus Arthritis</b>                              | <b>No (93)</b>       | <b>73.07 (11.97)</b> | <b>5.72 (1.39-10.05)</b>  | <b>0.028</b>                                       |
|                                                     | <b>Yes (52)</b>      | <b>67.34 (13.80)</b> |                           |                                                    |
| <b>Pain score (VAS)</b>                             | <b>≤ 4 (94)</b>      | <b>74.73 (10.65)</b> | <b>10.57 (6.11-15.03)</b> | <b>&lt;0.001</b>                                   |
|                                                     | <b>&gt; 4 (51)</b>   | <b>64.16 (13.96)</b> |                           |                                                    |
| Serum CRP level (mg/dL)                             | Normal (59)          | 73.66 (12.12)        | 7.14 (.47-13.81)          | .083                                               |
|                                                     | Increased (17)       | 66.52 (12.30)        |                           |                                                    |
| Corticosteroid usage in the previous month          | No (22)              | 70.83 (13.63)        | -0.221 (-6.14-5.70)       | .522                                               |
|                                                     | Yes (123)            | 71.05 (12.83)        |                           |                                                    |
| Corticosteroid mean dose (mg prednisone equivalent) | Low (107)            | 71.20 (12.72)        | .704 (-4.13-5.53)         | .784                                               |
|                                                     | High (38)            | 70.49 (13.57)        |                           |                                                    |
