# Supplementary material for: Muscle strength, not muscle mass, determines the health-related quality of life in Indonesian women with systemic lupus erythematosus
Source: HighWire-hosted journal article supplement (doi:10.1136/lupus-2023-001025), 2023-11-01
Supplement: lupus-2023-001025supp002_data_supplement.pdf [file lupus-2023-001025supp002_data_supplement.pdf]

### Indonesian translation of the SarQoL

The translation was performed according to translation guidelines established by Beaudart et al. Five different phases were followed:

- (i) the initial translation from French to Indonesian by two independent professional bilingual translators which were Indonesian native speakers;
- (ii) the synthesis of the first two translations to provide a single “version 1” of the translated questionnaire
- (iii) the backward translation by two independent bilingual blinded to the original French version and having French as their first language
- (iv) an expert committee review to compare the backward translations with the original questionnaire and consent on a “version 2” of the translated questionnaire
- (v) the pre-test of the “version 2” of the SarQoL<sup>®</sup> to ensure good comprehension of each question of the questionnaire and conclude with the “version 3”, final version of the Indonesian SarQoL<sup>®</sup>.

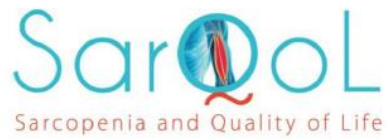

## Kuesioner I

Waktu : ±10 menit

### Kualitas hidup pada sarkopenia

Kuesioner ini menanyakan hal-hal seputar sarkopenia, yaitu kelemahan otot yang muncul akibat penuaan. Sarkopenia dapat memengaruhi kehidupan Anda sehari-hari. Survei ini memungkinkan kita untuk mengetahui apakah kondisi otot Anda saat ini mempengaruhi kualitas hidup Anda.

Silakan pilih jawaban yang paling sesuai untuk setiap pertanyaan. Kuesioner ini membutuhkan waktu kurang lebih 10 menit hingga selesai.

#### 1. Apakah saat ini Anda merasakan penurunan pada:

|                              | Banyak                   | Sebagian                 | Sedikit                  | Tidak ada                |
|------------------------------|--------------------------|--------------------------|--------------------------|--------------------------|
| Kekuatan lengan Anda?        | <input type="checkbox"/> | <input type="checkbox"/> | <input type="checkbox"/> | <input type="checkbox"/> |
| Kekuatan tungkai Anda?       | <input type="checkbox"/> | <input type="checkbox"/> | <input type="checkbox"/> | <input type="checkbox"/> |
| Massa otot Anda?             | <input type="checkbox"/> | <input type="checkbox"/> | <input type="checkbox"/> | <input type="checkbox"/> |
| Tenaga Anda?                 | <input type="checkbox"/> | <input type="checkbox"/> | <input type="checkbox"/> | <input type="checkbox"/> |
| Kemampuan fisik Anda?        | <input type="checkbox"/> | <input type="checkbox"/> | <input type="checkbox"/> | <input type="checkbox"/> |
| Kelenturan Anda secara umum? | <input type="checkbox"/> | <input type="checkbox"/> | <input type="checkbox"/> | <input type="checkbox"/> |

#### 2. Apakah terdapat nyeri pada otot-otot Anda?

- Sering
- Kadang-kadang
- Jarang
- Tidak pernah

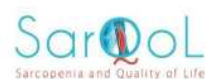

3. Saat melakukan aktivitas fisik **ringan** (berjalan perlahan, menyetrika, membersihkan debu, mencuci, membuat prakarya (menyulam, merajut, merakit), menyiram tanaman, dll), apakah Anda:

|                      | Sering                   | Kadang-kadang            | Jarang                   | Tidak Pernah             | Saya tidak pernah melakukan aktivitas semacam ini |
|----------------------|--------------------------|--------------------------|--------------------------|--------------------------|---------------------------------------------------|
| Mengalami kesulitan? | <input type="checkbox"/>                          |
| Merasa lelah?        | <input type="checkbox"/>                          |
| Merasakan nyeri?     | <input type="checkbox"/>                          |

4. Saat melakukan aktivitas fisik **sedang** (berjalan cepat, membersihkan jendela, menghisap debu/menyapu, mencuci mobil, mencabut ilalang di kebun, dll), apakah Anda:

|                      | Sering                   | Kadang-kadang            | Jarang                   | Tidak Pernah             | Saya tidak pernah melakukan aktivitas semacam ini |
|----------------------|--------------------------|--------------------------|--------------------------|--------------------------|---------------------------------------------------|
| Mengalami kesulitan? | <input type="checkbox"/>                          |
| Merasa lelah?        | <input type="checkbox"/>                          |
| Merasakan nyeri?     | <input type="checkbox"/>                          |

5. Saat melakukan aktivitas fisik yang **berat** (berlari, berjalan jauh, mengangkat benda berat, memindahkan perabotan rumah, menyangkul, dll), apakah Anda:

|                      | Sering                   | Kadang-kadang            | Jarang                   | Tidak Pernah             | Saya tidak pernah melakukan aktivitas semacam ini |
|----------------------|--------------------------|--------------------------|--------------------------|--------------------------|---------------------------------------------------|
| Mengalami kesulitan? | <input type="checkbox"/>                          |
| Merasa lelah?        | <input type="checkbox"/>                          |
| Merasakan nyeri?     | <input type="checkbox"/>                          |

6. Apakah saat ini Anda merasa tua?

- Ya, sangat
- Ya, agak
- Ya, sedikit
- Tidak, tidak sama sekali

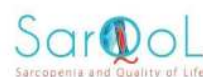

7. Jika menjawab ya untuk pertanyaan 6, apa yang membuat Anda memiliki anggapan bahwa anda merasa tua? (Pilih sebanyak mungkin yang sesuai)

- Saya menjadi mudah sakit
- Saya mengonsumsi banyak obat-obatan
- Saya merasa otot saya lemah
- Daya ingat saya terganggu
- Beberapa orang yang paling dekat dengan saya sudah meninggal
- Saya tidak memiliki banyak tenaga saya sering merasa lelah
- Penglihatan saya buruk
- Lainnya:

8. Apakah Anda merasa lemah secara fisik?

- Ya, sangat
- Ya, agak
- Ya, sedikit
- Tidak, tidak sama sekali

9. Apakah Anda merasa ada keterbatasan dalam:

|                                                   | Sangat terbatas          | Agak terbatas            | Sedikit terbatas         | Tidak terbatas           |
|---------------------------------------------------|--------------------------|--------------------------|--------------------------|--------------------------|
| Lama waktu Anda mampu berjalan?                   | <input type="checkbox"/> | <input type="checkbox"/> | <input type="checkbox"/> | <input type="checkbox"/> |
| Seberapa sering Anda keluar rumah untuk berjalan? | <input type="checkbox"/> | <input type="checkbox"/> | <input type="checkbox"/> | <input type="checkbox"/> |
| Jarak yang bisa Anda tempuh saat berjalan?        | <input type="checkbox"/> | <input type="checkbox"/> | <input type="checkbox"/> | <input type="checkbox"/> |
| Kecepatan saat Anda berjalan?                     | <input type="checkbox"/> | <input type="checkbox"/> | <input type="checkbox"/> | <input type="checkbox"/> |
| Panjang langkah Anda?                             | <input type="checkbox"/> | <input type="checkbox"/> | <input type="checkbox"/> | <input type="checkbox"/> |

10. Saat Anda berjalan:

|                                                                             | Sering                   | Kadang-kadang            | Jarang                   | Tidak pernah             | Saya tidak bisa berjalan |
|-----------------------------------------------------------------------------|--------------------------|--------------------------|--------------------------|--------------------------|--------------------------|
| Apakah Anda merasa sangat lelah?                                            | <input type="checkbox"/> |
| Apakah Anda perlu duduk istirahat secara berkala untuk memulihkan diri?     | <input type="checkbox"/> |
| Apakah Anda mengalami kesulitan untuk menyeberang jalan dengan cukup cepat? | <input type="checkbox"/> |
| Apakah Anda mengalami kesulitan dengan permukaan jalan yang tidak rata?     | <input type="checkbox"/> |

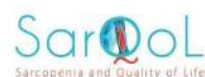

11. Apakah Anda bermasalah dengan keseimbangan Anda?

Sering

Kadang-kadang

Jarang

Tidak pernah

12. Seberapa sering Anda jatuh?

Sering

Kadang-kadang

Jarang

Tidak pernah

13. Menurut Anda, apakah penampilan fisik Anda telah berubah?

Ya, sangat

Ya, agak

Ya, sedikit

Tidak, tidak sama sekali

14. Jika menjawab ya untuk pertanyaan 13, apa yang membuat Anda memiliki anggapan bahwa penampilan fisik Anda telah berubah? (Pilih sebanyak mungkin jawaban yang sesuai)

Ada perubahan berat badan (bertambah atau berkurang)

Muncul kerutan-kerutan

Berkurangnya tinggi badan

Berkurangnya massa otot

Rambut rontok

Rambut mulai beruban

Lainnya: \_\_\_\_\_

15. Jika menjawab ya untuk pertanyaan 13, apakah Anda kesal dengan perubahan ini?

Ya, sangat

Ya, agak

Ya, sedikit

Tidak, tidak sama sekali

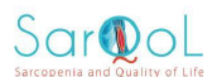

**16.** Apakah Anda merasa renta/rapuh (lemah fisik dan/atau mental)?

Sangat

Sedikit

Tidak sama sekali

**17.** Apakah saat ini Anda mengalami kesulitan dalam melakukan kegiatan sehari-hari berikut ini:

|                                                                                                                        | Tidak mampu              | Sangat sulit             | Sedikit sulit            | Mampu                    | Tidak dapat dinilai      |
|------------------------------------------------------------------------------------------------------------------------|--------------------------|--------------------------|--------------------------|--------------------------|--------------------------|
| Menaiki sederet anak tangga?                                                                                           | <input type="checkbox"/> |
| Menaiki beberapa deret anak tangga?                                                                                    | <input type="checkbox"/> |
| Naik satu atau beberapa anak tangga tanpa berpegangan?                                                                 | <input type="checkbox"/> |
| Berjongkok atau berlutut?                                                                                              | <input type="checkbox"/> |
| Membungkuk untuk mengambil benda dari lantai?                                                                          | <input type="checkbox"/> |
| Bangun dari lantai tanpa berpegangan sama sekali?                                                                      | <input type="checkbox"/> |
| Bangkit dari kursi yang tidak memiliki sandaran lengan (sofa)?                                                         | <input type="checkbox"/> |
| Bangkit, secara umum dari posisi duduk ke berdiri?                                                                     | <input type="checkbox"/> |
| Menjinjing benda berat (tas besar yang berisi belanjaan, panci yang berisi air, dll)?                                  | <input type="checkbox"/> |
| Membuka botol atau kaleng?                                                                                             | <input type="checkbox"/> |
| Menggunakan transportasi umum?                                                                                         | <input type="checkbox"/> |
| Masuk atau keluar dari mobil?                                                                                          | <input type="checkbox"/> |
| Berbelanja sendiri?                                                                                                    | <input type="checkbox"/> |
| Melakukan pekerjaan rumah tangga (membersihkan tempat tidur, menghisap debu/menyapu, menyetraka, mencuci piring, dll)? | <input type="checkbox"/> |





18. Apakah kelemahan otot Anda membatasi pergerakan Anda?

- Ya, sangat
- Ya, agak
- Ya, sedikit
- Tidak, tidak sama sekali

19. Jika menjawab ya untuk pertanyaan 18, apa alasannya? (Pilih sebanyak mungkin jawaban yang sesuai)

- Takut merasa nyeri
- Takut bahwa Anda mungkin tidak mampu melakukannya
- Takut merasa lelah setelah melakukan aktivitas-aktivitas tersebut
- Takut jatuh
- Lainnya:

20. Apakah kelemahan otot Anda membatasi aktivitas seksual Anda?

- Saya tidak aktif secara seksual
- Ya, sangat
- Ya, agak
- Ya, sedikit
- Tidak, tidak sama sekali

21. Bagaimana bentuk perubahan kegiatan Anda dalam aktivitas fisik/olahraga?

- Meningkat
- Menurun
- Tidak berubah
- Saya tidak pernah melakukan aktivitas fisik atau olahraga

22. Bagaimana bentuk perubahan kegiatan Anda di waktu senggang /bersantai (makan di luar, berkebun, membuat prakarya (menyulam, merajut, merakit), berburu/memancing, perkumpulan lansia, bermain kartu, berjalan-jalan, dll)?

- Meningkat
- Menurun
- Tidak berubah
- Saya tidak pernah melakukan kegiatan di waktu senggang/bersantai
